# Supplementary material for: Serum neurofilament as a predictor of 10-year grey matter atrophy and clinical disability in multiple sclerosis: a longitudinal study
Source: PubMed Central journal article supplement (PMC9304101; doi:10.1136/jnnp-2021-328568), 2022-06-01
Supplement: jnnp-2021-328568supp002.pdf [file jnnp-2021-328568supp002.pdf]

## Supplemental material

**Supplemental Table 1.** The association of mean inflammatory sNfL level calculated from at least two measurements and fGd+ with MRI atrophy and clinical measures at the 10-year follow-up, corrected for age, sex, DMT use, eTIV (MRI volume measures), BL T2LC and BL Gd+LC.

**Supplemental Table 1.** Model 1: The association of inflammatory sNfL level and fGd+ with MRI atrophy and clinical measures at the 10-year follow-up, corrected for age, sex, DMT use, eTIV, BL T2LC and BL Gd+LC<sup>a</sup>.

| <i>MRI/clinical measure</i>      | <i>N</i> | <b>Mean inflammatory sNfL level</b> |               |                           |                 | <b>fGd+</b> |               |                           | <b>Full model</b> |                           |                |
|----------------------------------|----------|-------------------------------------|---------------|---------------------------|-----------------|-------------|---------------|---------------------------|-------------------|---------------------------|----------------|
|                                  |          | <i>B</i>                            | <i>Std. B</i> | <i>95% conf. interval</i> | <i>p-value*</i> | <i>B</i>    | <i>Std. B</i> | <i>95% conf. interval</i> | <i>p-value*</i>   | <i>R<sup>2</sup> adj.</i> | <i>p-value</i> |
| Total GM volume                  | 35       |                                     |               |                           | NS              |             |               |                           | NS                |                           |                |
| Total WM volume                  | 35       |                                     |               |                           | NS              |             |               |                           | NS                |                           |                |
| Total subcortical GM volume      | 35       | -96.27                              | -0.397        | -175.064, -17.482         | <b>0.036</b>    |             |               |                           | NS                | 0.132                     | 0.018          |
| Thalamus volume                  | 35       |                                     |               |                           | NS              |             |               |                           | NS                |                           |                |
| Mean Cth                         | 35       | -0.002                              | -0.433        | -0.004, -0.001            | <b>0.036</b>    |             |               |                           | NS                | 0.163                     | 0.009          |
| logLesion volume <sup>b</sup>    | 39       |                                     |               |                           | NS              |             |               |                           | NS                |                           |                |
| logLesion count <sup>b</sup>     | 39       | 0.004                               | 0.508         | 0.002, 0.007              | <b>0.008</b>    |             |               |                           | NS                | 0.238                     | 0.001          |
| EDSS <sup>≥4</sup> <sup>c</sup>  | 45       |                                     |               |                           | NS              |             |               |                           | NS                |                           |                |
| logT25FW <sup>b</sup>            | 43       |                                     |               |                           | NS              |             |               |                           | NS                |                           |                |
| logChange in T25FW <sup>b</sup>  | 41       |                                     |               |                           | NS              |             |               |                           | NS                |                           |                |
| logD9-HPT <sup>b</sup>           | 43       |                                     |               |                           | NS              |             |               |                           | NS                |                           |                |
| logChange in D9-HPT <sup>b</sup> | 41       |                                     |               |                           | NS              | -0.554      | -0.406        | -0.928, -0.180            | <b>0.010</b>      | 0.285                     | 0.004          |

|                                   |    |        |        |                |              |        |        |                |              |       |       |
|-----------------------------------|----|--------|--------|----------------|--------------|--------|--------|----------------|--------------|-------|-------|
| logND9-HPT <sup>b</sup>           | 42 |        |        |                | NS           |        |        |                | NS           |       |       |
| logChange in ND9-HPT <sup>b</sup> | 41 | -0.454 | -0.320 | -0.803, -0.105 | <b>0.012</b> | -0.005 | -0.405 | -0.009, -0.001 | <b>0.035</b> | 0.367 | 0.001 |
| PASAT                             | 42 |        |        |                | NS           |        |        |                | NS           |       |       |
| Change in PASAT                   | 40 |        |        |                | NS           |        |        |                | NS           |       |       |
| Oral SDMT                         | 42 |        |        |                | NS           |        |        |                | NS           |       |       |

<sup>a</sup> Non-significant covariates removed from final model by backward elimination.

<sup>b</sup> Dependent variable log transformed due to non-normality (log-linear transformation).

<sup>c</sup> Analysed by logistic regression.

\*Adjusted *p*-values after controlling the False discovery rate (FDR) for multiple hypothesis testing.

Abbreviations: sNfL=serum neurofilament light chain, eTIV=estimated total intracranial volume, DMT=disease modifying therapy,

BL=baseline, Gd+=gadolinium-enhancing, LC=lesion count, fGd+=fraction of MRI scans with new Gadolinium-enhancing lesion, N=number,

B=beta, Std=standardised, GM=grey matter, WM=white matter, NS=not significant, Cth=cortical thickness, EDSS=expanded disability status

scale, T25FW=timed 25-foot walk, D9-HPT=dominant hand 9-hole peg test, ND9-HPT=non-dominant hand 9-hole peg test, PASAT=paced

auditory serial addition test, SDMT=symbol digit modalities test.

**Supplemental Table 2.** The association of mean non-inflammatory sNfL level calculated from at least two measurements with MRI atrophy and clinical measures at the 10-year follow-up, corrected for age, sex, DMT use, eTIV (MRI volume measures), BL T2LC and BL Gd+LC.

**Supplemental Table 2.** Model 2: The association of mean non-inflammatory sNfL level with MRI atrophy and clinical measures at the 10-year follow-up, corrected for age, sex, DMT use, eTIV, BL T2LC and BL Gd+LC<sup>a</sup>.

| <i>MRI/ clinical measure</i>    | <b>Mean non-inflammatory sNfL level</b> |          |               |                           |                 | <b>Full model</b>         |                |
|---------------------------------|-----------------------------------------|----------|---------------|---------------------------|-----------------|---------------------------|----------------|
|                                 | <i>N</i>                                | <i>B</i> | <i>Std. B</i> | <i>95% conf. interval</i> | <i>p-value*</i> | <i>R<sup>2</sup> adj.</i> | <i>p-value</i> |
| Total GM volume                 | 59                                      |          |               |                           | NS              |                           |                |
| Total WM volume                 | 59                                      |          |               |                           | NS              |                           |                |
| Total deep GM volume            | 59                                      |          |               |                           | NS              |                           |                |
| Thalamus volume                 | 59                                      |          |               |                           | NS              |                           |                |
| Mean Cth                        | 59                                      |          |               |                           | NS              |                           |                |
| logLesion volume <sup>b</sup>   | 60                                      |          |               |                           | NS              |                           |                |
| Lesion count                    | 60                                      |          |               |                           | NS              |                           |                |
| EDSS $\geq$ 4 <sup>c</sup>      | 67                                      |          |               |                           | NS              |                           |                |
| logT25FW <sup>b</sup>           | 64                                      |          |               |                           | NS              |                           |                |
| logChange in T25FW <sup>b</sup> | 62                                      |          |               |                           | NS              |                           |                |
| logD9-HPT <sup>b</sup>          | 63                                      |          |               |                           | NS              |                           |                |
| logChange D9-HPT <sup>b</sup>   | 61                                      |          |               |                           | NS              |                           |                |
| logND9-HPT <sup>b</sup>         | 62                                      |          |               |                           | NS              |                           |                |
| Change in ND9-HPT               | 60                                      |          |               |                           | NS              |                           |                |
| PASAT                           | 65                                      |          |               |                           | NS              |                           |                |
| Change in PASAT                 | 63                                      |          |               |                           | NS              |                           |                |
| Oral SDMT                       | 60                                      | 0.446    | 0.389         | 0.168, 0.724              | <b>0.002</b>    | 0.321                     | <0.001         |

<sup>a</sup> Non-significant covariates removed from final model by backward elimination.

<sup>b</sup> Dependent variable log transformed due to non-normality (log-linear transformation).

<sup>c</sup> Analysed by logistic regression.

\*Adjusted *p*-values after controlling the False discovery rate (FDR) for multiple hypothesis testing.

*Abbreviations: sNfL=serum neurofilament light chain, eTIV=estimated total intracranial volume, DMT=disease modifying therapy, BL=baseline, Gd+=gadolinium-enhancing, LC=lesion count, N=number, B=beta, Std=standardised, GM=grey matter, WM=white matter, NS=not significant, Cth=cortical thickness, EDSS=expanded disability status scale, T25FW=timed 25-foot walk, D9-HPT=dominant hand 9-hole peg test, ND9-HPT=non-dominant hand 9-hole peg test, PASAT=paced auditory serial addition test, SDMT=symbol digit modalities test.*

**Supplemental table 3.** The association of mean inflammatory sNfL level calculated from at least three measurements and fGd+ with MRI atrophy and clinical measures at the 10-year follow-up, corrected for age, sex, DMT use, eTIV (MRI volume measures), BL T2LC, BL Gd+LC and MRI atrophy measurements obtained at month 24.

**Supplemental table 3.** The association of inflammatory sNfL level and fGd+ with MRI atrophy measurements at the 10-year follow-up, corrected for age, sex, DMT use, eTIV, BL T2LC, Gd+LC, and MRI measurements at month 24<sup>a</sup>

| MRI measure          | N  | Mean inflammatory sNfL level |        |                    | fGd+     |   |        | Full model         |          |                     |         |
|----------------------|----|------------------------------|--------|--------------------|----------|---|--------|--------------------|----------|---------------------|---------|
|                      |    | B                            | Std. B | 95% conf. interval | p-value* | B | Std. B | 95% conf. interval | p-value* | R <sup>2</sup> adj. | p-value |
| Total GM volume      | 19 |                              |        |                    | NS       |   |        |                    | NS       |                     |         |
| Total WM volume      | 19 |                              |        |                    | NS       |   |        |                    | NS       |                     |         |
| Total deep GM volume | 19 |                              |        |                    | NS       |   |        |                    | NS       |                     |         |
| Thalamus volume      | 19 |                              |        |                    | NS       |   |        |                    | NS       |                     |         |
| Mean Cth             | 19 |                              |        |                    | NS       |   |        |                    | NS       |                     |         |

<sup>a</sup> Non-significant covariates removed from final model by backward elimination.

\*Adjusted p-values after controlling the False discovery rate (FDR) for multiple hypothesis testing.

*Abbreviations: sNfL=serum neurofilament light chain, eTIV=estimated total intracranial volume, DMT=disease modifying therapy, BL=baseline, Gd+=gadolinium-enhancing, LC=lesion count, fGd+=fraction of MRI scans with new Gadolinium-enhancing lesion, N=number, B=beta, Std=standardised, GM=grey matter, WM=white matter, NS=not significant, Cth=cortical thickness.*

**Supplemental Table 4.** Multiple linear regression with cortical thickness of the left and right precentral gyrus as dependent variables, mean inflammatory sNfL level, D9-HPT, change in D9-HPT, ND9-HPT and change in ND9-HPT are included as independent variables in separate models, all corrected for age, sex, DMT use, BL T2LC, BL Gd+LC and fGd+.

**Supplemental Table 4.** The association of mean inflammatory sNfL level, D9-HPT and ND9-HPT with mean cortical thickness of the precentral gyri at the 10-year follow-up, corrected for age, sex, DMT use, BL T2LC, BL Gd+LC and fGd+<sup>a</sup>.

| <b>Cortical thickness left precentral gyrus</b>  |          |          |               |                           |                 |                           |                |
|--------------------------------------------------|----------|----------|---------------|---------------------------|-----------------|---------------------------|----------------|
| <i>Independent variable</i>                      | <i>N</i> | <i>B</i> | <i>Std. B</i> | <i>95% conf. interval</i> | <i>p-value*</i> | <i>R<sup>2</sup> adj.</i> | <i>p-value</i> |
| Mean inflammatory sNfL level                     | 25       | -0.006   | -0.498        | -0.010, -0.001            | <b>0.015</b>    | 0.216                     | 0.011          |
| D9-HPT                                           | 66       | -0.011   | -0.426        | -0.018, -0.005            | <b>0.001</b>    | 0.169                     | <0.001         |
| Change in D9-HPT                                 | 62       |          |               |                           | NS              |                           |                |
| ND9-HPT                                          | 64       |          |               |                           | NS              |                           |                |
| Change in ND9-HPT                                | 62       |          |               |                           | NS              |                           |                |
| <b>Cortical thickness right precentral gyrus</b> |          |          |               |                           |                 |                           |                |
| Mean inflammatory sNfL level                     | 25       | -0.006   | -0.488        | -0.010, -0.001            | <b>0.013</b>    | 0.206                     | 0.013          |
| D9-HPT                                           | 66       | -0.010   | -0.410        | -0.016, -0.005            | <b>0.001</b>    | 0.276                     | <0.001         |
| Change in D9-HPT                                 | 62       |          |               |                           | NS              |                           |                |
| ND9-HPT                                          | 64       |          |               |                           | NS              |                           |                |
| Change in ND9-HPT                                | 62       |          |               |                           | NS              |                           |                |

<sup>a</sup> Non-significant covariates removed from final model by backward elimination.

\*Adjusted *p*-values after controlling the False discovery rate (FDR) for multiple hypothesis testing.

Abbreviations: sNfL=serum neurofilament light, BL=baseline, Gd+=gadolinium-enhancing, LC=lesion count, fGd+=fraction of MRI scans with new Gadolinium-enhancing lesion, D9-HPT=dominant hand 9-hole peg test, ND9-HPT=non-dominant hand 9-hole peg test, DMT=disease modifying therapy, N=number, B=beta, Std=standardised, conf=confidence, adj=adjusted.
